# Supplementary material for: Efficient catalytic oxidation of methyl aromatic hydrocarbon withN-alkyl pyridinium salts
Source: Royal Society of Chemistry journal article supplement (doi:10.1039/c9ra08185b), 2019-01-01
Supplement: c9ra08185b1.pdf [file c9ra08185b1.pdf]

# **Efficient Catalytic Oxidation of Methyl Aromatic Hydrocarbon with N-Alkyl Pyridinium Salts**

Qiaohong Zhang<sup>a</sup>, Honghao He<sup>a</sup>, Huibin Wang<sup>a</sup>, Zhan Zhang<sup>b, \*</sup>, Chen Chen<sup>a, \*</sup>

*<sup>a</sup> School of Material Science and Chemical Engineering, Ningbo University, 818 Fenghua Road,  
Ningbo, 315211, PR China*

*<sup>b</sup> China Tobacco Henan industrial Co. Ltd, No.8 The 3rd Avenue, Zhengzhou, 450001, PR China*

## **Supplementary Material**

---

\* Corresponding author. E-mail: chenchen@nbu.edu.cn; zhangzhan2059729@126.com

**Correlative FT-IR and NMR spectrums:**

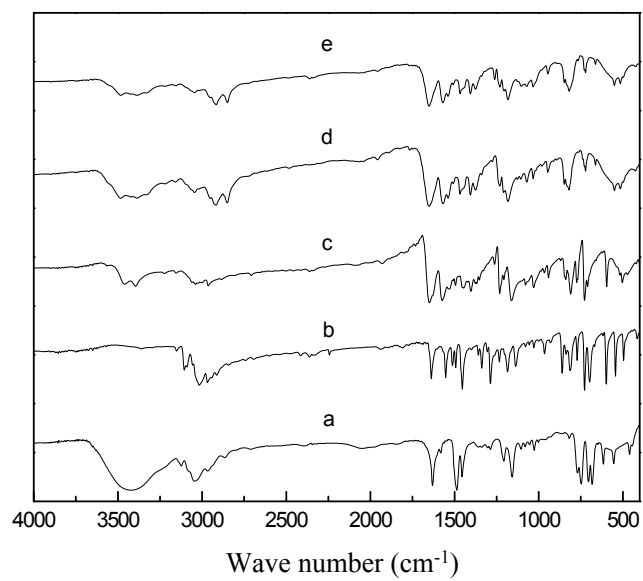

**Figure S1.** FT-IR spectrum for different *N*-alkylpyridinium salt.

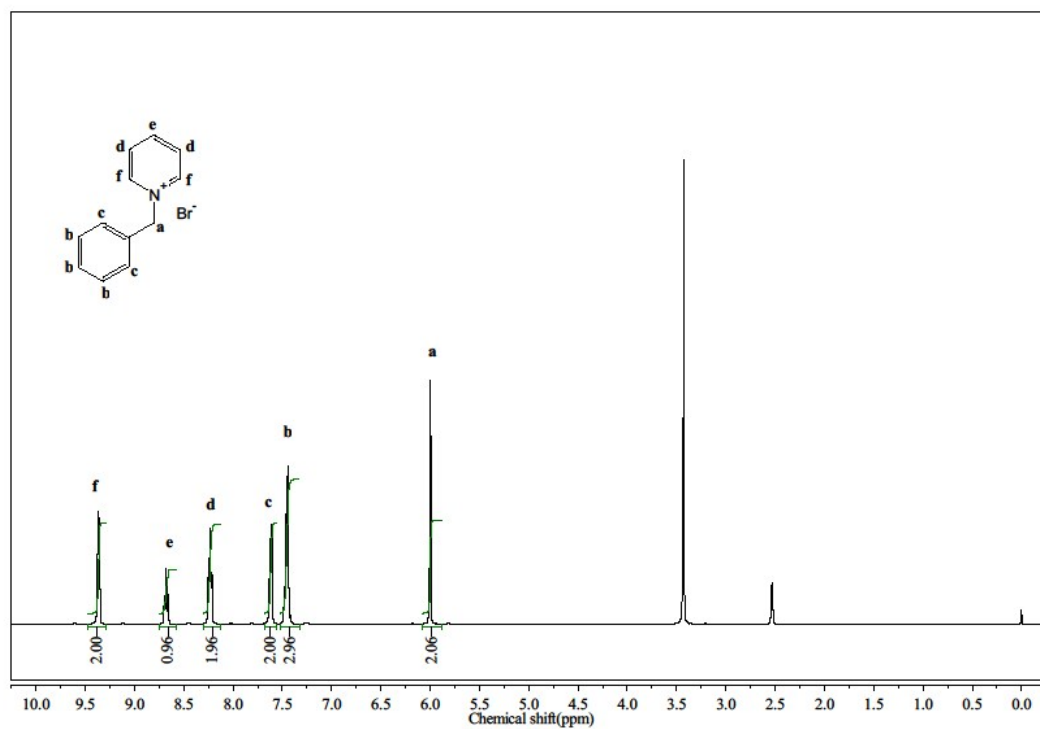

a. <sup>1</sup>H NMR spectrum

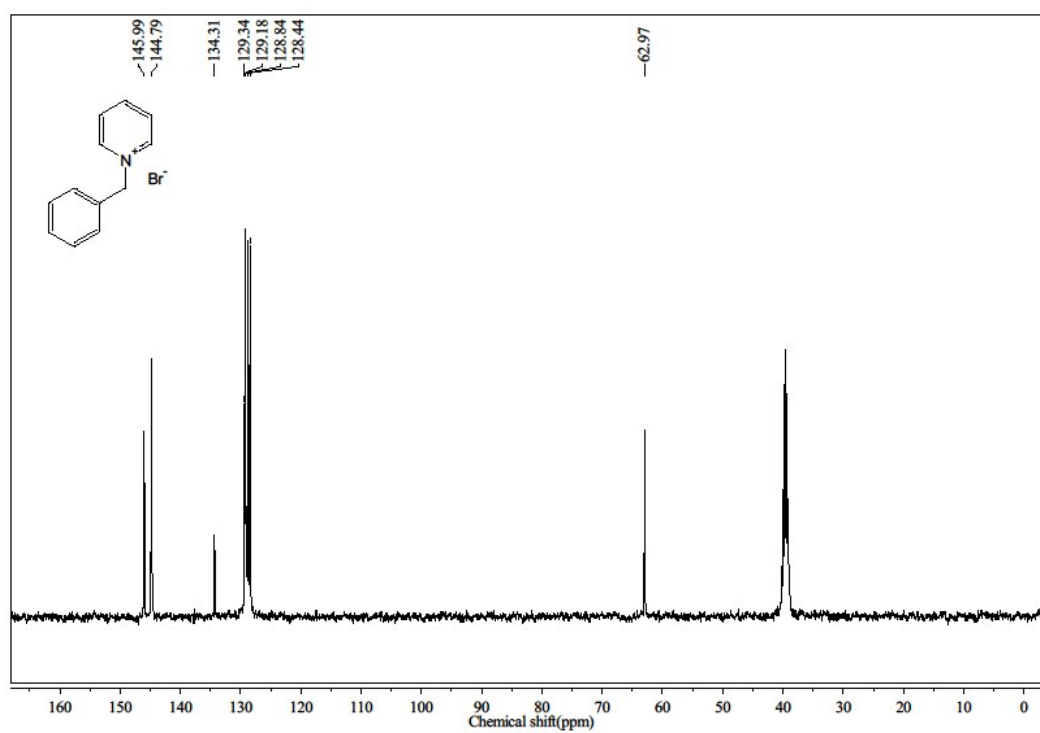

b. <sup>13</sup>C NMR spectrum

Figure S2. NMR spectrum of 1-benzyl pyridinium bromide.

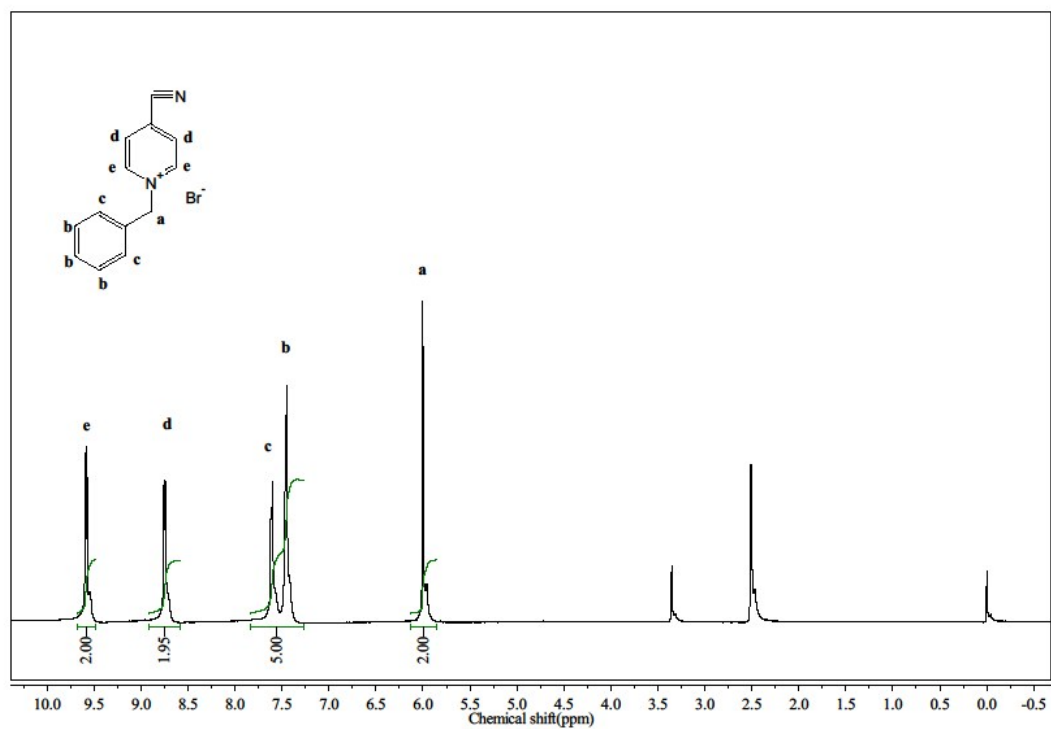

a. <sup>1</sup>H NMR spectrum

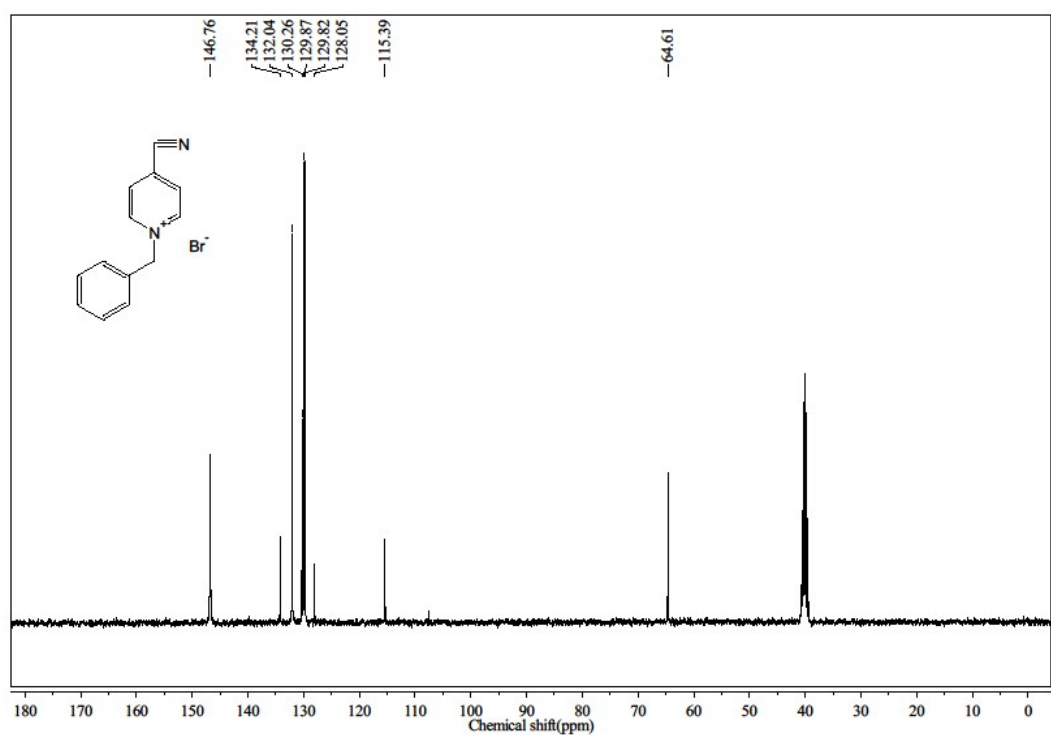

b. <sup>13</sup>C NMR spectrum

Figure S3. NMR spectrum of 1-benzyl-4-cyano pyridinium bromide.

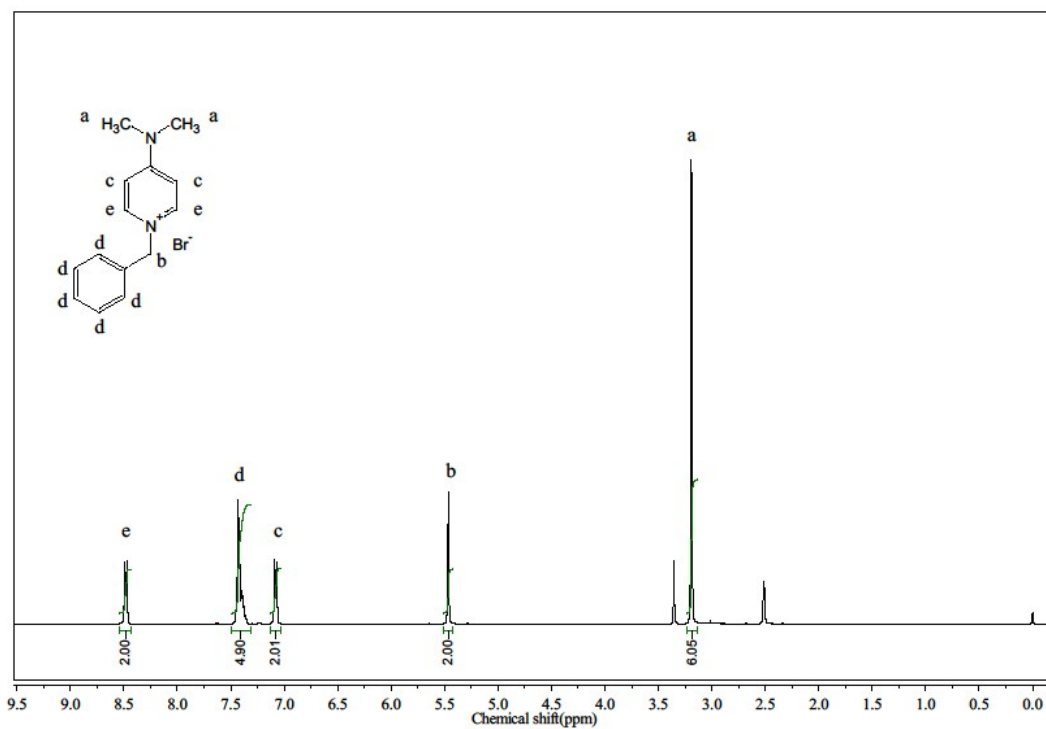

**a.**  $^1\text{H}$  NMR spectrum

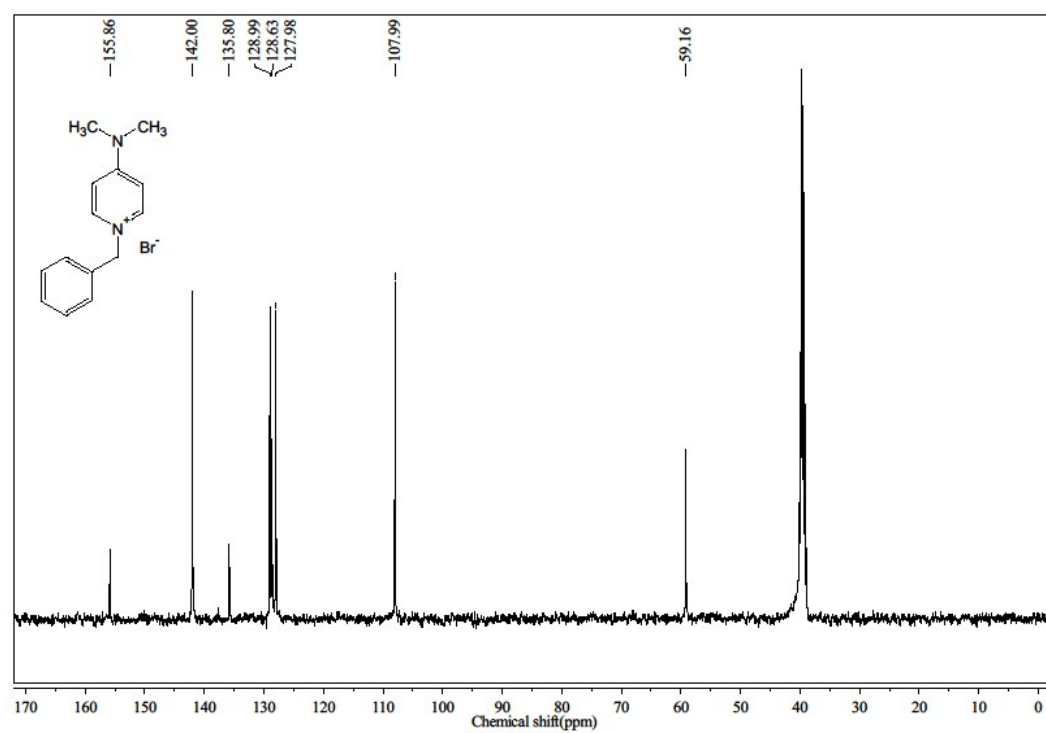

**b.**  $^{13}\text{C}$  NMR spectrum

**Figure S4.** NMR spectrum of 1-benzyl-4-dimethylaminopyridinium bromide.

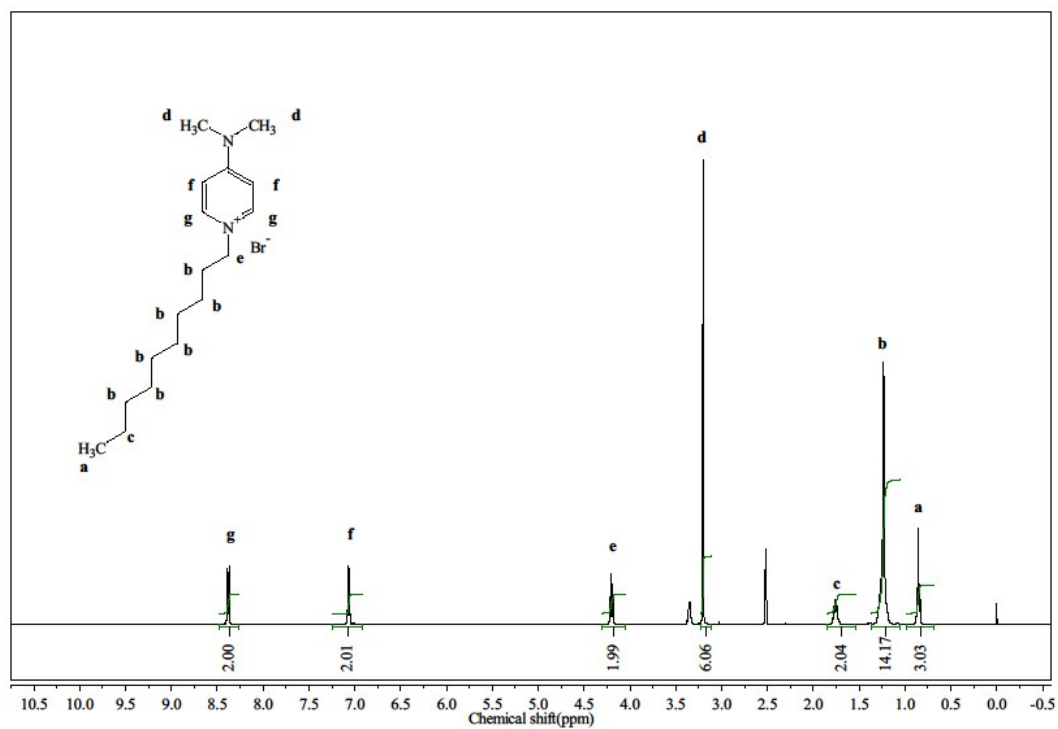

a. <sup>1</sup>H NMR spectrum

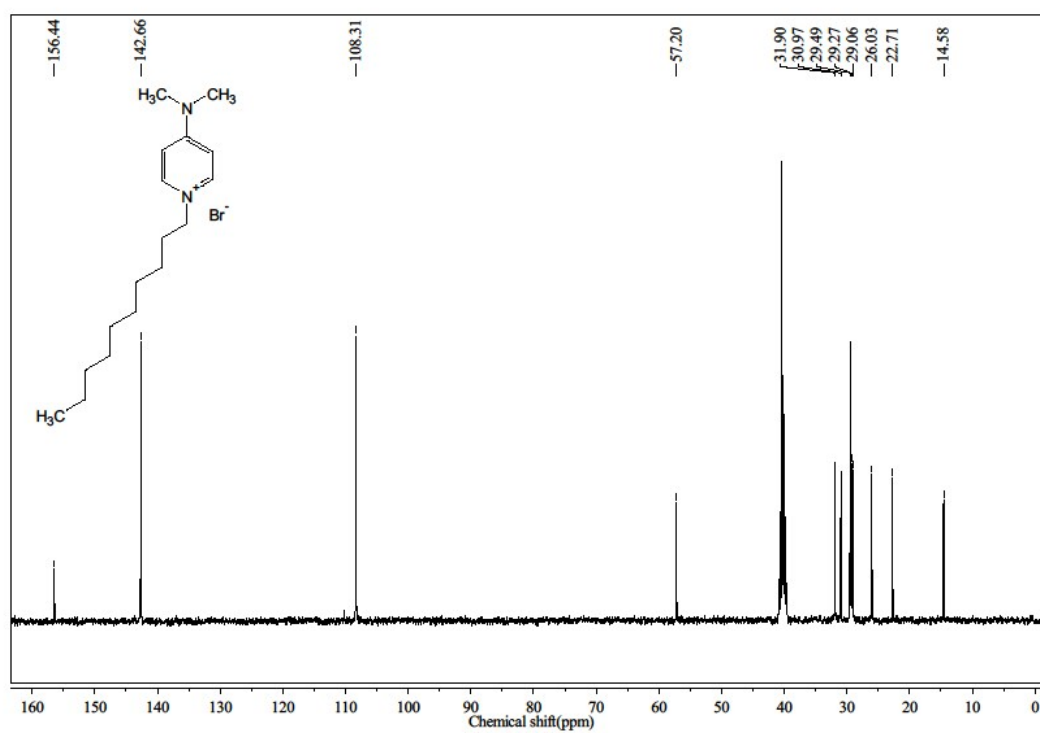

b. <sup>13</sup>C NMR spectrum

Figure S5. NMR spectrum of 1-decyl-4-dimethylaminopyridinium bromide.

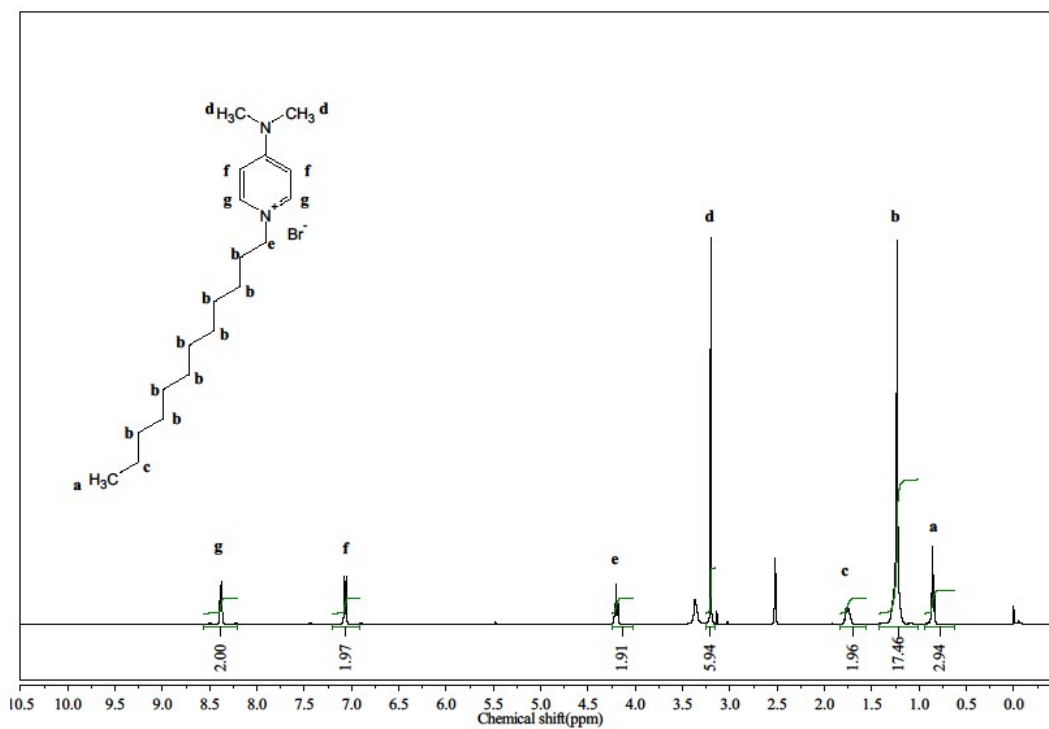

a.  $^1\text{H}$  NMR spectrum

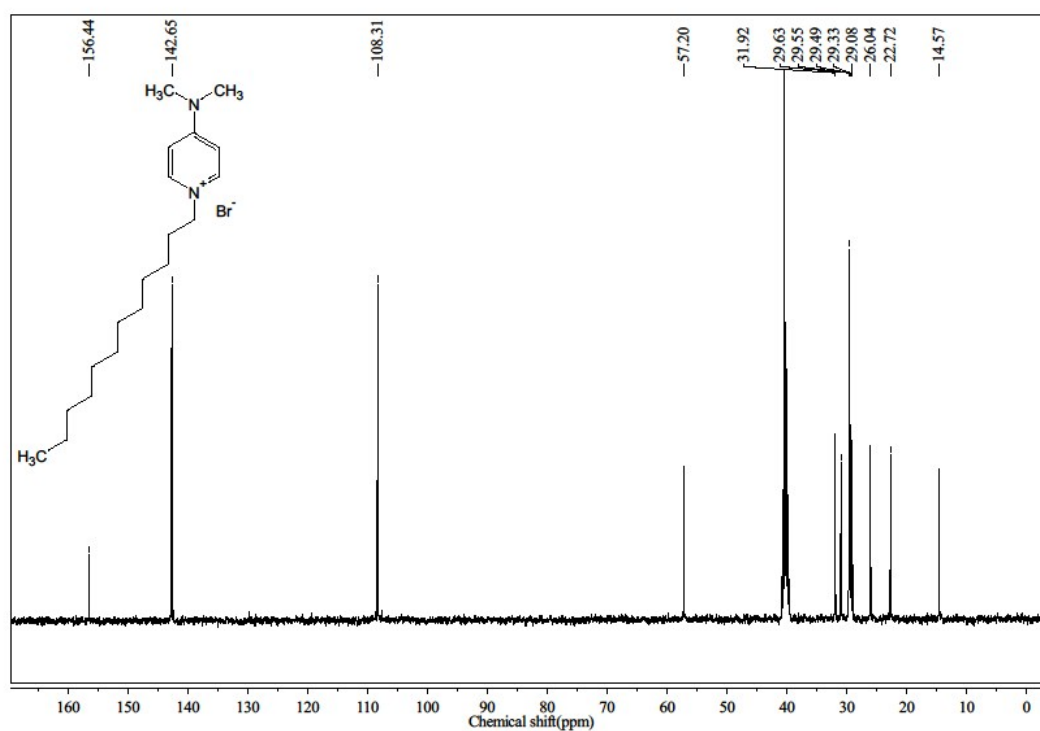

b.  $^{13}\text{C}$  NMR spectrum

Figure S6. NMR spectrum of 1-dodecyl-4-dimethylaminopyridinium bromide.

## Optimization of reaction temperature

Using **c** as catalyst, the results for *p*-xylene oxidation under different temperature were shown in Figure S7. Increasing the temperature, the conversion of *p*-xylene increased. Further increasing the temperature from 160 °C to 180 °C, the *p*-xylene conversion increased little. Optimized reaction temperature was selected as 160 °C. However, the yield of *p*-toluic acid (TA) decreased, while formation of deep oxidation product of 4-CBA and TPA increased.

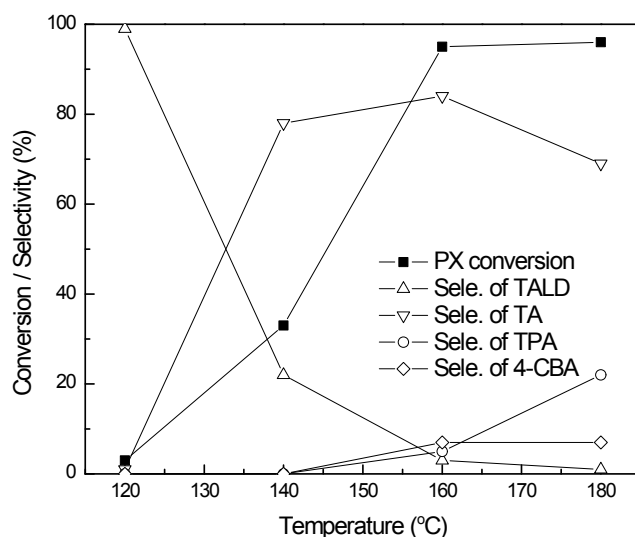

**Figure S7.** Influence of temperature on the catalytic oxidation of *p*-xylene.

Reaction conditions: 10 mmol of *p*-xylene, 0.5 mmol of **c**, 5 ml of acetonitrile, 0.2 mmol of *p*-tolualdehyde as initiator, 1.5 MPa O<sub>2</sub>, 4h.

## Optimization of catalyst concentration

Using **c** as the catalyst, the optimization of different catalyst concentration was also



carried out. The results were shown in Figure S8. When 1 mol % of **c** was used as the catalyst, the conversion of *p*-xylene was 55 %. Increasing the catalyst concentration from 1 mol % to 5 mol %, the *p*-xylene conversion increased to 95 %. Further increasing the catalyst concentration to 7 mol %, however, no remarkable improvement for the oxidation was observed. Therefore, the catalyst concentration of 5 mol % was suitable.

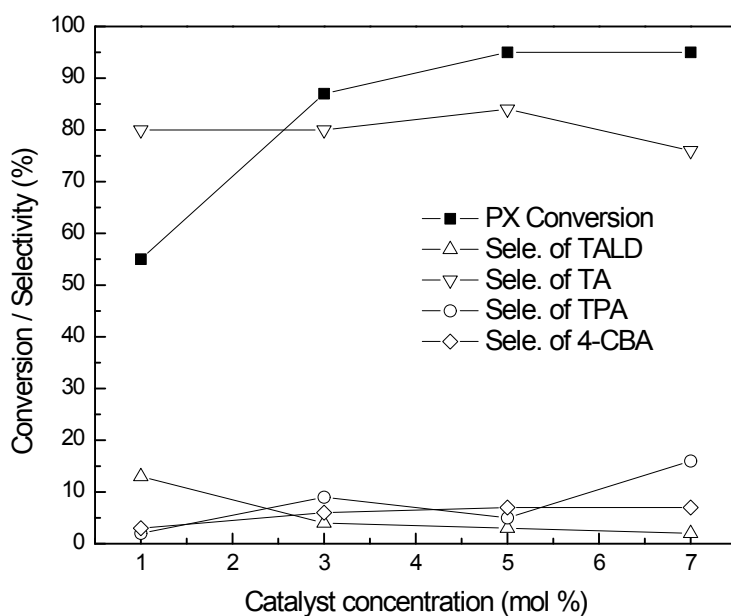

**Figure S8.** The effect of catalyst concentration

Reaction conditions: 10 mmol of *p*-xylene, 5 ml of acetonitrile, 0.2 mmol of *p*-tolualdehyde as initiator, **c** used as catalyst, 1.5 MPa O<sub>2</sub>, 160 °C, 4h.
